# Supplementary material for: Prospective correlation between the patient microbiome with response to and development of immune-mediated adverse effects to immunotherapy in lung cancer
Source: PubMed Central journal article supplement (PMC8278634; doi:10.1186/s12885-021-08530-z), 2021-07-13
Supplement: 12885_2021_8530_MOESM5_ESM.pdf [file 12885_2021_8530_MOESM5_ESM.pdf]

**Supplemental Table 1. Individual Patient and Disease Characteristics.**

| JZLC.ID | Age at Diagnosis (years) | Sex | Abx within 4 wks of initiation | PPI within 4 wks of start | Probiotic within 4 wks of start | Cancer Type                 | PD-L1 Status (if tested)     | Prior Immunotherapy | Prior Chemotherapy     | Cancer Stage at Start of Current Therapy | Line of Current Therapy | Current Immunotherapy | Current Chemotherapy    |
|---------|--------------------------|-----|--------------------------------|---------------------------|---------------------------------|-----------------------------|------------------------------|---------------------|------------------------|------------------------------------------|-------------------------|-----------------------|-------------------------|
| JZLC.01 | 74                       | F   | N                              | N                         | N                               | Adeno                       | 0                            | Pembrolizumab       | Carboplatin pemetrexed | 4A                                       | 2                       | Pembrolizumab         | Docetaxel               |
| JZLC.02 | 68                       | M   | N                              | Y                         | Y                               | Squamous                    | 2+, 5% (TC)                  | No                  | No                     | 4A                                       | 1                       | Durvalumab            | s/p CCRT                |
| JZLC.03 |                          |     |                                |                           |                                 | <b>Not enrolled</b>         |                              |                     |                        |                                          |                         |                       |                         |
| JZLC.04 | 72                       | F   | N                              | N                         | N                               | Squamous                    | 0                            | No                  | Carboplatin Etoposide  | 4A                                       | 2                       | Pembrolizumab         |                         |
| JZLC.05 | 71                       | F   | N                              | N                         | N                               | Small cell                  |                              | No                  | No                     | Extensive                                | 1                       | Atezolizumab          | Carboplatin Etoposide   |
| JZLC.06 | 75                       | F   | N                              | N                         | N                               | Adeno                       |                              | No                  | No                     | 4A                                       | 1                       | Pembrolizumab         | Carboplatin Pemetrexed  |
| JZLC.07 | 51                       | F   | N                              | N                         | N                               | Small cell                  |                              | No                  | Carboplatin Etoposide  | Extensive                                | 2                       | Pembrolizumab         |                         |
| JZLC.08 | 72                       | M   | N                              | N                         | N                               | Non small cell, NOS         | 2+, 10% (TPS)<br>5% (IHC)    | No                  | No                     | 4B                                       | 1                       | Pembrolizumab         | Carboplatin Paclitaxel  |
| JZLC.09 | 60                       | F   | N                              | Y                         | Y                               | Adeno                       | 3+, 95% (TC)                 | Nivolumab           | Carboplatin Pemetrexed | 4B                                       | 3                       | Pembrolizumab         | Docetaxel               |
| JZLC.10 | 86                       | M   | N                              | N                         | N                               | Squamous                    |                              | No                  | No                     | 3A                                       | 1                       | Pembrolizumab         | Carboplatin Paclitaxel  |
| JZLC.11 | 58                       | M   | N                              | N                         | N                               | Adeno                       |                              | No                  | Carboplatin Paclitaxel | 2A                                       | 2                       | Durvalumab            | s/p CCRT                |
| JZLC.12 | 59                       | M   | Y                              | N                         | N                               | Small cell                  |                              | No                  | No                     | Extensive                                | 1                       | Atezolizumab          | Carboplatin Etoposide   |
| JZLC.13 |                          |     |                                |                           |                                 | <b>Not enrolled</b>         |                              |                     |                        |                                          |                         |                       |                         |
| JZLC.14 | 70                       | M   | N                              | N                         | N                               | Squamous                    | 3+, 5% (TC)<br>Negative (IC) | No                  | Cisplatin Etoposide    | 3A                                       | 2                       | Durvalumab            | s/p CCRT                |
| JZLC.15 | 63                       | M   | N                              | N                         | N                               | Adeno                       | 3+, 100% (TPS)               | No                  | No                     | 4B                                       | 1                       | Pembrolizumab         | Carboplatin Pemetrexed  |
| JZLC.16 | 78                       | F   | N                              | N                         | N                               | Sarcomatoid                 | 2+, 75% (TPS)                | No                  | No                     | 4A                                       | 1                       | Pembrolizumab         | Carboplatin Paclitaxel  |
| JZLC.17 | 55                       | F   | N                              | Y                         | Y                               | Small cell                  |                              | No                  | No                     | Extensive                                | 1                       | Atezolizumab          | Carboplatin Etoposide   |
| JZLC.18 | 61                       | M   | Y                              | Y                         | Y                               | Squamous                    | 0                            | Pembrolizumab       | Carboplatin Paclitaxel | 4A                                       | 2                       | Pembrolizumab         | Gemcitabine             |
| JZLC.19 | 67                       | F   | Y                              | N                         | N                               | Non small cell, NOS         | 3+, 100% (TPS)               | No                  | No                     | 4B                                       | 1                       | Pembrolizumab         |                         |
| JZLC.20 | 61                       | M   | N                              | Y                         | Y                               | Squamous                    | 50% (IC)                     | No                  | No                     | 3B                                       | 1                       | Durvalumab            | s/p CCRT                |
| JZLC.21 | 42                       | M   | N                              | N                         | N                               | Squamous                    | 3+, 75% (TPS)                | No                  | No                     | 4B                                       | 1                       | Pembrolizumab         |                         |
| JZLC.22 | 72                       | F   | Y                              | N                         | N                               | Squamous                    | 2+, 2-3% (TPS)               | No                  | No                     | 4B                                       | 1                       | Pembrolizumab         | Carboplatin Paclitaxel  |
| JZLC.23 | 69                       | F   | N                              | N                         | N                               | Squamous                    |                              | No                  | No                     | 2B                                       | 1                       | Durvalumab            | s/p CCRT                |
| JZLC.24 | 72                       | M   | Y                              | N                         | N                               | Non small cell, NOS         |                              | No                  | No                     | 3B                                       | 1                       | Durvalumab            | s/p CCRT                |
| JZLC.25 | 62                       | M   | N                              | N                         | N                               | Squamous                    |                              | No                  | Cisplatin Etoposide    | 3A                                       | 2                       | Durvalumab            | s/p CCRT                |
| JZLC.26 | 49                       | M   | Y                              | N                         | N                               | Large cell                  | 0                            | No                  | Carboplatin Paclitaxel | 4B                                       | 2                       | Pembrolizumab         | Carboplatin Pemetrexed  |
| JZLC.27 | 42                       | F   | N                              | N                         | N                               | Adeno                       | 2+, 60% (TPS)                | No                  | No                     | 4B                                       | 1                       | Pembrolizumab         |                         |
| JZLC.28 | 47                       | M   | N                              | N                         | N                               | Adeno                       | 2+, 50% (TPS)                | No                  | No                     | 4A                                       | 1                       | Pembrolizumab         |                         |
| JZLC.29 | 65                       | M   | N                              | N                         | N                               | Adeno                       | 0                            | Pembrolizumab       | Carboplatin Pemetrexed | 4B                                       | 3                       | Atezolizumab          | Paclitaxel              |
| JZLC.30 | 69                       | F   | Y                              | N                         | N                               | Adeno                       | 0                            | No                  | No                     | 3B                                       | 1                       | Pembrolizumab         | Carboplatin Pemetrexed  |
| JZLC.31 | 54                       | F   | N                              | N                         | N                               | Squamous and adenocarcinoma |                              | No                  | Cisplatin Vinorelbine  | 4A                                       | 2                       | Pembrolizumab         | Carboplatin Paclitaxel  |
| JZLC.32 | 74                       | F   | N                              | N                         | N                               | Adeno                       | 2+, 5% (TPS)                 | No                  | No                     | 4B                                       | 1                       | Pembrolizumab         | Carboplatin Pemetrexed  |
| JZLC.33 | 78                       | M   | N                              | N                         | N                               | Adeno                       | 2+, 20% (TPS)<br>5% (IC)     | No                  | No                     | 4B                                       | 1                       | Pembrolizumab         | Carboplatin, pemetrexed |
| JZLC.34 | 70                       | M   | N                              | N                         | N                               | Squamous                    | 0                            | No                  | No                     | 3A                                       | 1                       | Durvalumab            | s/p CCRT                |
| JZLC.35 |                          |     |                                |                           |                                 | <b>Not enrolled</b>         |                              |                     |                        |                                          |                         |                       |                         |
| JZLC.36 | 63                       | F   | Y, Z-Pak                       | N                         | N                               | Adeno                       |                              | No                  | No                     | 4A                                       | 1                       | Durvalumab            | s/p CCRT                |
| JZLC.37 | 78                       | M   | Y, nitrofurantoin              | N                         | N                               | Squamous and adenocarcinoma | 2-3+, 5-10% (TPS)            | No                  | No                     | 4A                                       | 1                       | Pembrolizumab         |                         |

s/p CCRT = status-post concurrent chemoradiation therapy.

**Supplemental Table 2. Reasons for Sample Collection.**

| <b>Patient</b> | <b>Sample Set 2</b> | <b>irAE (Grade)</b>                 | <b>AE (Grade)</b>                       | <b>Sample Set 3</b>    |
|----------------|---------------------|-------------------------------------|-----------------------------------------|------------------------|
| JZLC-5         | Onset of toxicity   | Rash (4)                            | Neutropenia (4)<br>Thrombocytopenia (4) |                        |
| JZLC-6         | Onset of toxicity   | Diarrhea (3)                        | Neutropenia (3)<br>Fever (3)            | Resolution of toxicity |
| JZLC-8         | Onset of toxicity   | Nausea/vomiting (3)<br>Diarrhea (3) |                                         |                        |
| JZLC-10        | Onset of toxicity   | Myositis (1)<br>Weakness (3)        | Neuropathy (3)<br>Thrombocytopenia (2)  | Resolution of toxicity |
| JZLC-11        | Onset of toxicity   | Rash (3)<br>Pneumonitis (1)         |                                         | Resolution of toxicity |
| JZLC-12        | Onset of toxicity   | Rash (2)                            | Myalgias (1)                            |                        |
| JZLC-19        | Onset of toxicity   | Sicca Syndrome (4)<br>Weakness (3)  |                                         |                        |
| JZLC-21        | Onset of toxicity   | Arthralgias (1)                     |                                         |                        |
| JZLC-22        | Onset of toxicity   | Diarrhea (3)                        |                                         | Resolution of toxicity |
| JZLC-23        | Onset of toxicity   | Pneumonitis (3)                     |                                         |                        |
| JZLC-24        | Onset of toxicity   | Pneumonitis (4)                     |                                         | Resolution of toxicity |
| JZLC-30        | Onset of toxicity   | Pneumonitis (2)                     |                                         |                        |
| JZLC-32        | Onset of toxicity   | Thrombocytopenia (1)                |                                         |                        |

irAE = immune-related adverse event.

**Note:** in the case of JZLC.32, the treating investigator felt the patient's thrombocytopenia could not be clearly attributed to a non-immune etiology. Thus, the patient submitted a second set of samples and treatment with steroids was initiated.

### Supplemental Table 3: Collection Omissions

#### Fecal Sampling

| <b>Patient ID</b> | <b>Reason for Omission</b>                |
|-------------------|-------------------------------------------|
| JZLC.03           | Withdrawn before beginning trial          |
| JZLC.06           | Not collected                             |
| JZLC.13           | Withdrawn before beginning trial          |
| JZLC.17           | Received - unable to be sequenced         |
| JZLC.23           | Received - unable to be sequenced         |
| JZLC.26           | Mislabeled sample, excluded from analysis |
| JZLC.28           | Stool sample was empty                    |
| JZLC.33           | Stool sample not returned (deceased)      |
| JZLC.34           | Received - unable to be sequenced         |
| JZLC.35           | Withdrawn before beginning trial          |

#### Buccal and Nasal Sampling

| <b>Patient ID</b> | <b>Reason for Omission</b>                |
|-------------------|-------------------------------------------|
| JZLC.03           | Withdrawn before beginning trial          |
| JZLC.13           | Withdrawn before beginning trial          |
| JZLC.26           | Mislabeled sample, excluded from analysis |
| JZLC.35           | Withdrawn before beginning trial          |

**Supplemental Table 4. Notable differences between healthy controls and lung cancer gut microbiome.**

| <b>Bacteria</b>               | <b>p</b>   | <b>FDR</b> |
|-------------------------------|------------|------------|
| UBA1819                       | 4.06E-07   | 2.41E-05   |
| Eggerthella                   | 6.78E-07   | 2.41E-05   |
| Ruminococcaceae_UCG_004       | 7.96E-06   | 0.00018836 |
| Ruminiclostridium_5           | 1.47E-05   | 0.0002609  |
| Eisenbergiella                | 2.90E-05   | 0.00041168 |
| DTU089                        | 4.01E-05   | 0.00047431 |
| Lachnospiraceae_FCS020_group  | 9.40E-05   | 0.00095393 |
| Erysipelatoclostridium        | 0.00016304 | 0.001447   |
| Lachnospira                   | 0.00020046 | 0.0015814  |
| Flavonifractor                | 0.00022482 | 0.0015962  |
| Barnesiella                   | 0.00026928 | 0.0017381  |
| Ruminococcaceae_UCG_014       | 0.0006498  | 0.0038447  |
| Faecalitalea                  | 0.0010503  | 0.0057363  |
| Lachnoclostridium             | 0.001231   | 0.0062428  |
| Tyzzera                       | 0.0017741  | 0.0083973  |
| Erysipelotrichaceae_UCG_003   | 0.0021165  | 0.009392   |
| Akkermansia                   | 0.0045814  | 0.019134   |
| Sutterella                    | 0.0055505  | 0.021894   |
| Prevotella_9                  | 0.0072068  | 0.026931   |
| Intestinibacter               | 0.0099776  | 0.03542    |
| Butyricimonas                 | 0.012273   | 0.038691   |
| Slackia                       | 0.012682   | 0.038691   |
| Holdemanella                  | 0.012892   | 0.038691   |
| Collinsella                   | 0.013416   | 0.038691   |
| Escherichia_Shigella          | 0.013623   | 0.038691   |
| Lachnospiraceae_NK4A136_group | 0.014663   | 0.039654   |
| Butyricoccus                  | 0.01508    | 0.039654   |
| Dialister                     | 0.01629    | 0.041306   |
| Christensenellaceae_R_7_group | 0.021369   | 0.052316   |
| Ruminococcaceae_UCG_005       | 0.022431   | 0.053087   |
| Blautia                       | 0.026031   | 0.059618   |
| Turicibacter                  | 0.034103   | 0.075666   |
| Dorea                         | 0.037102   | 0.079827   |
| Streptococcus                 | 0.039668   | 0.082835   |
| Coprococcus_1                 | 0.049035   | 0.099472   |

FDR = false discovery rate.
